# Supplementary material
Source: publisher site journal article supplement (https://www.dovepress.com/article/227493)
Supplement: Supplementary file 1 [file get_supplementary_file.php]

**Real-World Safety and Effectiveness of OnabotulinumtoxinA Treatment of Crow’s Feet Lines and Glabellar Lines: Results of a Korean Postmarketing Surveillance Study**

**Supplementary Information**

**Table S1.** Participating sites (no. of sites = 26)

| **Site ID** | **Site Name** |
| --- | --- |
| 01 | Dr. Robbin Clinic |
| 02 | BLS Clinic |
| 03 | Toxnfill Clinic |
| 11 | Shine Clinic |
| 15 | Park View Plastic Surgery & Aesthetic |
| 16 | Swiss Clinic |
| 17 | Cella Plastic Surgery Clinic |
| 21 | IWILL Clinic |
| 33 | Seoul Plastic Surgery |
| 34 | Kangnam Stardom Plastic Surgery |
| 35 | Chungnam National University Hospital |
| 39 | SoonChunHyang University Seoul Hospital |
| 40 | Yeungnam University Hospital |
| 41 | Asan Medical Center |
| 43 | BLS Clinic |
| 46 | Toxnfill Clinic Nowon Branch |
| 49 | Skinique Clinic |
| 52 | Yonsei La Eine Clinic |
| 53 | Yonsei La Michou Clinic |
| 55 | Gowoonmom Clinic |
| 58 | Bonien Clinic |
| 61 | Cyan Clinic |
| 62 | Lyzbelle Clinic |
| 63 | Fulore Clinic |
| 64 | Toxnfill Clinic Chonan Branch |
| 65 | Toxnfill Clinic Daejeon Branch |
